# Supplementary material for: Survival Rates of Patients with Non-Small Cell Lung Cancer Depending on Lymph Node Metastasis: A Focus on Saliva
Source: MDPI journal article supplement (doi:10.3390/diagnostics11050912), 2021-05-20
Supplement: s1 [file s1]

## Article

# Survival Rates of Patients with Non-Small Cell Lung Cancer Depending on Lymph Node Metastasis: A Focus on Saliva

Lyudmila V. Bel'skaya <sup>1,\*</sup>, Elena A. Sarf <sup>1</sup> and Victor K. Kosenok <sup>2</sup>

<sup>1</sup> Biochemistry Research Laboratory, Omsk State Pedagogical University, 644099 Omsk, Russia; nem-cha@mail.ru

<sup>2</sup> Department of Oncology, Omsk State Medical University, 644099 Omsk, Russia; victorkosenok@gmail.com

\* Correspondence: ludab2005@mail.ru and belskaya@omgpu.ru

**Table S1.** Characteristics of cohorts depending on the differences in the chemical composition of saliva in pNo.

| LNS | Variables                  | Favorable Prognosis        | Unfavorable Prognosis      |
|-----|----------------------------|----------------------------|----------------------------|
| pNo |                            | LDH                        |                            |
|     | LDH, U/L                   | >1294                      | <1294                      |
|     | Age, years                 | 61.8±1.93                  | 60.3±1.86                  |
|     | Gender                     | M—45, F—15                 | M—52, F—8                  |
|     | pT                         | pT1—9, pT2—42, pT3—9       | pT1—9, pT2—38, pT3—13      |
|     | Histological subtype       | ADC—37, SCC—23             | ADC—38, SCC—22             |
|     | Morphological growth forms | Peripheral—56, central—4   | Peripheral—50, central—10  |
|     | Treatment type             | Radical—37, combined—20    | Radical—42, combined—16    |
|     | Smoking status             | Smokers—27, non-smokers—33 | Smokers—26, non-smokers—34 |
|     | Relapse status             | Yes—13, no—47              | Yes—20, no—40              |
| pNo |                            | DC                         |                            |
|     | DC, c.u.                   | <3.97                      | >3.97                      |
|     | Age, years                 | 59.7±1.95                  | 62.1±1.82                  |
|     | Gender                     | M—44, F—12                 | M—53, F—11                 |
|     | pT                         | pT1—9, pT2—37, pT3—10      | pT1—9, pT2—43, pT3—12      |
|     | Histological subtype       | ADC—36, SCC—20             | ADC—39, SCC—25             |
|     | Morphological growth forms | Peripheral—49, central—7   | Peripheral—57, central—6   |
|     | Treatment type             | Radical—35, combined—20    | Radical—44, combined—16    |
|     | Smoking status             | Smokers—21, non-smokers—35 | Smokers—32, non-smokers—32 |
|     | Relapse status             | Yes—13, no—43              | Yes—20, no—44              |
| pNo |                            | LDH + DC                   |                            |
|     | LDH + DC                   | >1294, <3.97               | <1294, >3.97               |
|     | Age, years                 | 61.2±2.37                  | 61.9±2.13                  |
|     | Gender                     | M—23, F—7                  | M—31, F—3                  |
|     | pT                         | pT1—5, pT2—19, pT3—6       | pT1—5, pT2—20, pT3—9       |
|     | Histological subtype       | ADC—17, SCC—13             | ADC—19, SCC—15             |
|     | Morphological growth forms | Peripheral—27, central—3   | Peripheral—29, central—5   |
|     | Treatment type             | Radical—16, combined—13    | Radical—23, combined—9     |
|     | Smoking status             | Smokers—11, non-smokers—19 | Smokers—16, non-smokers—18 |
|     | Relapse status             | Yes—5, no—25 *             | Yes—12, no—22              |

Note. \*—differences are statistically significant,  $p < 0.05$ ; ADC—adenocarcinoma, SCC—squamous cell carcinoma; M—male, F—female. LNS—lymph node status. LDH—lactate dehydrogenase, DC—diene conjugates.

**Table S2.** Characteristics of cohorts depending on the differences in the chemical composition of saliva in pN<sub>1</sub>.

| LNS             | Variables                  | Favorable Prognosis                  | Unfavorable Prognosis                 |
|-----------------|----------------------------|--------------------------------------|---------------------------------------|
|                 |                            | ICs                                  |                                       |
| pN <sub>1</sub> | ICs, mmol/L                | <0.296                               | >0.296                                |
|                 | Age, years                 | 59.8±2.49                            | 60.4±3.31                             |
|                 | Gender                     | M—21, F—4                            | M—24, F—2                             |
|                 | pT                         | pT2—11, pT3—13, pT4—1                | pT2—9, pT3—10, pT4—7                  |
|                 | Histological subtype       | ADC—11, SCC—14                       | ADC—11, SCC—15                        |
|                 | Morphological growth forms | Peripheral—15, central—10            | Peripheral—12, central—13             |
|                 | Treatment type             | Radical—3, combined—14, palliative—6 | Radical—0, combined—13, palliative—13 |
|                 | Smoking status             | Smokers—12, non-smokers—13           | Smokers—16, non-smokers—10            |
|                 | Relapse status             | Yes—16, no—9                         | Yes—16, no—10                         |
| MM              |                            |                                      |                                       |
| pN <sub>1</sub> | MM, c.u.                   | >0.903                               | <0.903                                |
|                 | Age, years                 | 60.4±2.77                            | 59.8±3.11                             |
|                 | Gender                     | M—22, F—4                            | M—23, F—2                             |
|                 | pT                         | pT2—9, pT3—14, pT4—3                 | pT2—11, pT3—9, pT4—5                  |
|                 | Histological subtype       | ADC—10, SCC—16                       | ADC—12, SCC—13                        |
|                 | Morphological growth forms | Peripheral—14, central—12            | Peripheral—14, central—11             |
|                 | Treatment type             | Radical—2, combined—14, palliative—9 | Radical—1, combined—13, palliative—10 |
|                 | Smoking status             | Smokers—11, non-smokers—15           | Smokers—17, non-smokers—8             |
|                 | Relapse status             | Yes—17, no—9                         | Yes—15, no—10                         |
| ICs + MM        |                            |                                      |                                       |
| pN <sub>1</sub> | ICs + MM                   | < 0.296, > 0.903                     | > 0.296, < 0.903                      |
|                 | Age, years                 | 61.1±3.46                            | 61.2±4.66                             |
|                 | Gender                     | M—13, F—2                            | M—15, F—0                             |
|                 | pT                         | pT2—5, pT3—9, pT4—1                  | pT2—5, pT3—5, pT4—5                   |
|                 | Histological subtype       | ADC—6, SCC—9                         | ADC—7, SCC—8                          |
|                 | Morphological growth forms | Peripheral—9, central—6              | Peripheral—8, central—7               |
|                 | Treatment type             | Radical—2, combined—8, palliative—4  | Radical—0, combined—7, palliative—8   |
|                 | Smoking status             | Smokers—6, non-smokers—9             | Smokers—11, non-smokers—4             |
|                 | Relapse status             | Yes—9, no—6                          | Yes—8, no—7                           |

Note. ADC—adenocarcinoma, SCC—squamous cell carcinoma; M—male, F—female. LNS—lymph node status. ICs—imidazole compounds, MM—middle molecular toxins.

**Table S3.** Characteristics of cohorts depending on the differences in the chemical composition of saliva in pN<sub>2</sub>.

| LNS             | Variables                  | Favorable prognosis                      | Unfavorable prognosis                    |
|-----------------|----------------------------|------------------------------------------|------------------------------------------|
|                 |                            | Protein                                  |                                          |
| pN <sub>2</sub> | Protein, g/L               | >0.583                                   | <0.583                                   |
|                 | Age, years                 | 59.1±3.04                                | 58.2±2.52                                |
|                 | Gender                     | M—27, F—6                                | M—27, F—7                                |
|                 | pT                         | pT3—16, pT4—17                           | pT3—20, pT4—14                           |
|                 | Histological subtype       | ADC—16, SCC—17                           | ADC—17, SCC—17                           |
|                 | Morphological growth forms | Peripheral—16, central—16, mediastinal—1 | Peripheral—16, central—16, mediastinal—2 |
|                 | Treatment type             | Radical—3, combined—9, palliative—18     | Radical—2, combined—10, palliative—17    |
|                 | Smoking status             | Smokers—13, non-smokers—20               | Smokers—17, non-smokers—17               |
|                 | Relapse status             | Yes—22, no—11                            | Yes—18, no—16                            |
| pN <sub>2</sub> | SB                         |                                          |                                          |
|                 | SB, c.u.                   | < 0.602                                  | > 0.602                                  |
|                 | Age, years                 | 59.0±2.87                                | 59.1±2.67                                |
|                 | Gender                     | M—27, F—7                                | M—28, F—6                                |
|                 | pT                         | pT3—21, pT4—13                           | pT3—15, pT4—19                           |
|                 | Histological subtype       | ADC—18, SCC—16                           | ADC—12, SCC—13                           |
|                 | Morphological growth forms | Peripheral—16, central—16, mediastinal—2 | Peripheral—17, central—16, mediastinal—1 |
|                 | Treatment type             | Radical—2, combined—10, palliative—19    | Radical—3, combined—9, palliative—17     |
|                 | Smoking status             | Smokers—15, non-smokers—19               | Smokers—16, non-smokers—18               |
|                 | Relapse status             | Yes—19, no—15                            | Yes—22, no—12                            |
| pN <sub>2</sub> | Protein + SB               |                                          |                                          |
|                 | Protein + SB               | > 0.583 + > 0.602; < 0.583 + < 0.602     | < 0.583 + > 0.602; > 0.583 + < 0.602     |
|                 | Age, years                 | 58.6±2.59                                | 59.3±4.66                                |
|                 | Gender                     | M—28, F—7                                | M—26, F—6                                |
|                 | pT                         | pT3—21, pT4—14                           | pT3—15, pT4—17                           |
|                 | Histological subtype       | ADC—14, SCC—21                           | ADC—19, SCC—13                           |
|                 | Morphological growth forms | Peripheral—16, central—18, mediastinal—1 | Peripheral—16, central—14, mediastinal—2 |
|                 | Treatment type             | Radical—3, combined—13, palliative—15    | Radical—2, combined—6, palliative—20     |
|                 | Smoking status             | Smokers—14, non-smokers—21               | Smokers—16, non-smokers—16               |
|                 | Relapse status             | Yes—21, no—14                            | Yes—19, no—13                            |

Note.  $p < 0.05$ ; ADC—adenocarcinoma, SCC—squamous cell carcinoma; M—male, F—female. LNS—lymph node status. SB—Schiff bases.
